# Supplementary material
Source: publisher figshare collection journal article supplement (https://geolsoc.figshare.com/ndownloader/files/24539470)
Supplement: Supplementary file 1 [file 24539470]

## Sheet: SIMS data
OKA-BUSE Standard
Mg	688.33
Ca	400439
Sr	14275
Y	15.2
Nb	2.32
Ba	2022
La	317
Ce	343
Nd	114
	C1	C2	D1	D2	E	F	H	A	M		C3	B1	J	I	K	L
	core	core									rim
Mg	929.3	909.5	876.3	885.72	798.09	316.05	1144.7	997.83	1480.1		1510.6	407.5	1199.5	1688.5	358.56	770.62
Ca	400430	400430	400430	400430	400430	400430	400430	400430	400430		400430	400430	400430	400430	400430	400430
Sr	512.1	432.4	411.6	405.48	293.01	195.24	445.28	380.95	314.31		202.4	71.9	132.54	162.99	47.78	56.13
Y	2.32	2.26	1.19	1.72	2.14	0.51	0.66	0.56	0.82		0.06	0.07	0.11	0.02	0.07	0.07
Nb	2.8							1.59	4.8		1.63
Ba	7.62	4.39	4.48	6	4.67	1.06	5.02	6.75	5.51		4.2	0.35	1.5	1.93	0.15	0.37
La	4.39	5.18	2.6	5.09	6.67	1.83	1.91	0.61	1.42		0.05	0.48	1.44		0.05	0.32
Ce	0.14	0.07	0.12	0.3	0.59	0.12	0.05	0.08	0.08		0.05	0.02	0.09			0.02
Nd	2.2	1.52	0.6	2.92	2.48	0.61	1.19	0.39	0.93		0.81		0.25			0.26
All values in ppm

## Sheet: EMPA data
	SiO2	TiO2	Al2O3	MgO	CaO	FeO	Na2O	K2O	MnO	P2O5	SO2	F	Cl	Total
Silica-rich	wt.%	wt.%	wt.%	wt.%	wt.%	wt.%	wt.%	wt.%	wt.%	wt.%	wt.%	wt.%	wt.%
NQN2 Spherule F Core 1	74.691	0.0265	1.1992	0.136	12.0677	0.117	13.7508	0.4292	0.0347	0.0089	0.2555		0.019	102.735
NQN2 Spherule F Core 2	73.7404	0.033	1.1134	0.1091	12.0409	0.1027	13.611	0.3973	0.0243	0.0126	0.251	0.0043	0.018	101.458
NQN2 Spherule F Core 3	72.5935	0.026	1.2377	0.1059	12.1198	0.0567	13.5877	0.4285	0.0226	0.0245	0.265		0.0233	100.484
NQN2 Spherule F Core 4	74.6133	0.0264	1.1633	0.0966	12.5499	0.228	13.8187	0.4142	0.0244	0.0145	0.2624		0.0218	103.219
NQN2 Spherule F Core 5	73.048	0.0282	1.0314	0.1154	12.2593	0.0246	13.7169	0.3599	0.0218	0.0161	0.2658		0.0227	100.903
NQN2 Spherule F Rim 1	71.8936	0.0227	1.0758	0.0926	11.9174		13.637	0.4402	0.027	0.013	0.2569		0.0175	99.3437
NQN2 Spherule F Rim 2	72.069	0.0288	1.2116	0.1313	12.073	0.0567	13.9643	0.4236	0.0274	0.0008	0.2578		0.0146	100.252
NQN2 Spherule F Rim 3	73.3278	0.0242	1.0528	0.0938	11.8125	0.1158	13.3921	0.3917	0.0275	0.0103	0.2667		0.0168	100.516
NQN2 Spherule F Rim 4	75.3083	0.0286	1.0867	0.0991	12.2387	0.0156	10.772	0.3571	0.028	0.0059	0.2668	0.0337	0.0204	100.261
NQN2 Spherule A Core	73.025	0.0274	1.076	0.1773	11.612	0.2137	14.207	0.3667	0.0268	0.0187	0.2158	0	0.0145	100.981
NQN2 Spherule A Core 2	73.0055	0.0319	1.0841	0.1749	11.444	0.1006	14.104	0.3695	0.0232	0.0248	0.2171	0	0.0141	100.594
NQN2 Spherule A Core 3	73.1742	0.034	1.0516	0.194	11.5046	0.1434	14.0486	0.3962	0.0324	0.0051	0.2229	0	0.0108	100.818
NQN2 Spherule A Core 4	73.5832	0.0302	0.9893	0.1521	11.8284	0.1949	14.2504	0.3354	0.031	0.0235	0.2211	0	0.0141	101.654
NQN2 Spherule A Core 5	72.5706	0.0242	1.2809	0.168	11.4605	0.058	13.9912	0.327	0.029	0.0128	0.2143	0	0.0161	100.153
NQN2 Spherule A Core 6	74.0827	0.0329	1.1045	0.1798	11.873	0.0916	14.7163	0.4703	0.0346	0.0203	0.2179	0.0006	0.0164	102.841
NQN2 Spherule A Core 6	73.5325	0.0342	0.9505	0.1622	11.7412	0.1992	14.0498	0.4041	0.023	0.0143	0.2147	0	0.0171	101.343
NQN2 Spherule A Core 7	73.1027	0.031	1.0859	0.1546	11.6872	0.0762	14.2715	0.4553	0.0221	0.0102	0.2226	0	0.0175	101.137
NQN2 Spherule A Core 8	72.5027	0.0283	0.9749	0.1751	11.6118	0.2562	14.0753	0.4542	0.0157	0.0138	0.2297	0.0166	0.0169	100.371
NQN2 Spherule A Core 9	72.5369	0.0277	1.0523	0.192	11.5987	0.0977	14.3265	0.3502	0.0191	0.019	0.2216	0	0.0155	100.457
NQN2 Spherule A Core 10	71.7643	0.0233	0.9866	0.1702	11.6564	0.1245	14.6757	0.2893	0.0284	0.0108	0.2255	0.0019	0.0172	99.9741
NQN2 Spherule A Rim 1	72.187	0.0266	1.0949	0.1637	11.8418	0.1924	13.7491	0.4422	0.0374	0.0202	0.2134	0	0.0203	99.989
NQN2 Spherule A Rim 2	72.3906	0.0331	1.2046	0.2579	11.5272	0.3627	14.2049	0.3226	0.0217	0.0222	0.2078	0.0004	0.0138	100.57
NQN2 Spherule A Rim 3	72.1834	0.0329	1.0801	0.167	11.8808	0.149	14.4742	0.4084	0.0231	0.0163	0.2185	0.0223	0.0178	100.674
NQN 2 II Spherule Core 1	74.9007		1.7517	0.0319	6.8002		16.0573	0.2652	0.0292	0.0348	0.3203	0.4959	0.2263	100.697
NQN 2 II Spherule Core 2	75.4763		1.7307	0.0081	6.5055	0.0663	15.8725	0.2822	0.0068	0.0304	0.3341	0.5247	0.2288	100.872
NQN 2 II Spherule Core 3	75.3895		1.9948	0.0004	6.7149	0.0439	16.0122	0.2897	0.007	0.0474	0.3151	0.4642	0.2304	101.32
NQN 2 II Spherule Core 4	74.9397		1.5883		6.64	0.0617	15.978	0.2495	0.0059	0.0331	0.32	0.5026	0.2303	100.29
NQN 2 II Spherule Core 5	74.5711		1.7996	-0.0042	6.9185		16.4838	0.265	0.0181	0.0363	0.3025	0.477	0.2277	100.894
NQN 2 II Spherule Core 6	75.186		1.704		6.5478	0.0815	16.4099	0.3082	0.012	0.0497	0.3126	0.49	0.2315	101.126
NQN 2 II Spherule Core 7	74.652		1.7713		6.9078	0.04	16.2679	0.3065	0.0155	0.0332	0.3077	0.4891	0.2229	100.789
NQN 2 II Spherule Rim 1	74.1982		1.7539		6.7811	0.0715	16.2134	0.257	0.0162	0.0484	0.3195	0.4417	0.2281	100.112
NQN 2 II Spherule Rim 2	75.0691		1.5159		6.7345	0.0377	15.7185	0.2989	0.0068	0.0353	0.317	0.4461	0.2365	100.206
NQN 2 II Spherule Rim 3	72.7625		1.7379		6.5599	0.0935	15.6415	0.2857	0.0067	0.0311	0.3081	0.3748	0.2242	97.8137
NQN 2 II Spherule Rim 4	73.783		1.6015		6.7813	0.0123	15.9554	0.2652	0.0184	0.0306	0.3115	0.4781	0.2282	99.2675
NQN 2 II Spherule Rim 5	72.9522		1.7315	0.0067	6.4783		15.8833	0.2963	0.0044	0.0379	0.3087	0.407	0.2304	98.1143
NQN 2 II Spherule Rim 6	73.1645		1.8066	0.0001	6.6558	0.041	15.3951	0.2226	0.0154	0.0374	0.3201	0.3328	0.2291	98.0279
NQN 2 II Spherule Rim 7	73.6757		1.8996	0.0074	6.4619	0.0426	16.0539	0.3051	0.0039	0.0278	0.3059	0.4312	0.2284	99.2515
NQN2 Spherule B Core 1	71.3935	0.0957	0.5432	3.7241	9.417	0.0991	14.1737	0.1803	0.0039	0.0038	0.22	0.0064	0.0078	99.8685
NQN2 Spherule B Core 2	72.3293	0.0979	0.7153	3.5554	9.1535	0.1994	14.0845	0.1302	0	0.0023	0.2216	0.0054	0.009	100.504
NQN2 Spherule B Core 3	72.2981	0.097	0.7207	3.6449	8.9995	0.1005	13.9096	0.2103	0.0076	0.0061	0.2199	0	0.0103	100.224
NQN2 Spherule B Core 4	72.235	0.1045	0.6192	3.6555	9.1607	0.121	14.0697	0.2018	0	0.002	0.2232	0.0032	0.0089	100.405
NQN2 Spherule B Rim 1	71.8875	0.1017	0.6907	3.7323	9.0894	0	13.9273	0.1871	0.0032	0.011	0.2408	0	0.0109	99.8819
NQN2 Spherule B Rim 2	71.6247	0.0966	0.7428	3.6843	9.0461	0.2136	13.6462	0.1943	0.0007	0	0.2321	0	0.0148	99.4962
NQN2 Spherule B Rim 3	73.7599	0.1007	0.723	3.6826	9.4064	0.087	14.0807	0.2257	0.0038	0	0.2352	0.0077	0.0086	102.321
NQN2 Spherule C Core 1	73.1592	0.0166	0.0845	3.5916	9.5369	0.097	13.6669	0.0147	0.0168	0.0021	0.1906	0.003	0.0071	100.387
NQN2 Spherule C Core 2	73.163	0.0163	0.1451	3.4327	9.4859	0.0871	13.8236	0	0	0.0067	0.1967	0	0.0056	100.363
NQN2 Spherule C Core 3	74.3675	0.0192	0.1618	3.6422	9.4524	0.1079	13.7101	0	0.0158	0.0048	0.1841	0	0.0077	101.674
NQN2 Spherule C Core 4	72.7787	0.0171	0.2407	3.741	9.4283	0.1041	13.2793	0	0.0115	0	0.1953	0	0.0058	99.8018
NQN2 Spherule C Core 5	73.6944	0.0165	0.1625	3.5847	9.1748	0.0574	13.8933	0.0093	0	0.0036	0.1961	0	0.0051	100.798
NQN2 Spherule C Core 6	72.3551	0.0141	0.1442	3.6029	9.5407	0.0802	13.6081	0	0.0015	0.0073	0.1852	0.0042	0.0046	99.5481
NQN2 Spherule C Core 6	72.7891	0.0093	0.102	3.7317	9.4784	0.0703	13.5222	0.0154	0.0021	0.008	0.1896	0	0.006	99.9241
NQN2 Spherule C Core 7	73.2662	0.0152	0.1078	3.5676	9.1237	0.1398	13.3668	0.0208	0.0084	0.0135	0.2006	0	0.0074	99.8378
NQN2 Spherule C Rim 1	75.331	0.0206	0.1638	3.7459	9.3737	0.123	14.0809	0.0121	0	0.011	0.1897	0.0039	0.0085	103.064
NQN2 Spherule C Rim 2	73.2829	0.0114	0.1556	3.5216	9.2001	0.0859	13.6883	0.059	0.01	0.0058	0.197	0	0.0087	100.226
NQN2 Spherule C Rim 3	75.2924	0.0118	0.2035	3.7211	9.6674	0.1764	13.9336	0	0	0.0096	0.1896	0.0103	0.0074	103.223
NQN2 Spherule C Rim 4	75.1944	0.0159	0.113	3.6691	9.6963	0.1571	14.0177	0.0321	0	0	0.1985	0	0.0082	103.102
NQN2 Spherule D Core 1	75.1306	0.0298	2.4635	0.2674	10.4399	0.2356	14.6851	0.8574	0.0102	0.0175	0.1758	0.0095	0.0074	104.33
NQN2 Spherule D Core 2	72.9142	0.0323	2.0172	0.25	10.287	0	13.4658	0.858	0.0025	0.0152	0.1874	0.0033	0.0071	100.04
NQN2 Spherule D Core 3	74.3587	0.0332	1.9745	0.3296	10.328	0.2003	14.3381	0.8609	0	0.0285	0.177	0.0117	0.0073	102.648
NQN2 Spherule D Rim 1	75.3026	0.0272	1.8917	0.3068	10.3879	0.0461	13.9386	0.8254	0.0016	0.0178	0.1827	0	0.0079	102.936
NQN2 Spherule D Rim 2	73.6849	0.0253	1.9081	0.2499	10.4726	0.0611	14.0891	0.9158	0.0008	0.0069	0.1827	0.0159	0.0092	101.622
NQN2 Spherule D Rim 3	72.777	0.0335	2.0894	0.244	10.1748	0.0123	13.6555	0.9342	0.0082	0.0209	0.1765	0	0.0084	100.135
	73.9215	0.0286667	1.96307	0.2669	10.3451	0.0398333	13.8944	0.8918	0.00353333	0.0152	0.180633	0.0053	0.0085
NQN2 Spherule E Core 1	73.3001	0.0274	0.2593	3.8801	8.7575	0.5079	13.4468	0.184	0	0.0088	0.1956	0.0038	0.0136	100.585
NQN2 Spherule E Core 2	73.8096	0.0276	0.4038	3.8669	8.4976	0.4959	13.7936	0.1367	0.0047	0.0102	0.1817	0	0.0171	101.245
NQN2 Spherule E Core 3	74.1492	0.0257	0.2978	3.7672	8.5629	0.6191	13.7205	0.1233	0.0086	0.0135	0.1957	0	0.019	101.502
NQN2 Spherule E Core 4	72.9162	0.0363	0.2707	3.9087	8.6846	0.4491	13.3318	0.2135	0.0154	0.0124	0.1797	0	0.0166	100.035
NQN2 Spherule E Rim 1	74.5045	0.0356	0.4263	3.9543	8.8246	0.4695	13.7692	0.2141	0.0111	0.0238	0.1795	0	0.0155	102.428
NQN2 Spherule E Rim 2	72.4332	0.0443	1.1075	3.8057	8.2888	0.5136	13.4611	0.5151	0.0141	0.0094	0.1568	0.0085	0.0161	100.374
NQN2 Spherule E Rim 3	75.1273	0.0307	0.4414	3.8529	9.2365	0.1283	13.2648	0.1227	0	0.0079	0.2291	0.0117	0.0184	102.472
Mafic
NQN 4 II Spherule B Core 1	48.7655	3.1854	15.6148	4.3079	9.6024	11.7092	3.8287	1.9604	0.1712	0.8782	0.0558	0.1163	0.0398	100.236
NQN 4 II Spherule B Core 2	49.0914	3.1884	14.855	4.4572	9.6759	11.9708	4.0417	1.9702	0.1672	0.8804	0.056	0.1373	0.0363	100.528
NQN 4 II Spherule B Rim 1	47.5362	3.1813	15.2891	4.1554	9.4606	11.4562	3.0937	1.8309	0.1625	0.9006	0.0509	0.1167	0.0461	97.28
NQN 4 II Spherule B Rim 2	49.3264	3.2354	15.198	4.3653	9.7051	11.895	3.2591	1.9268	0.1618	0.8918	0.0623	0.1015	0.041	100.169
NQN 4 II Spherule C Core 1	38.6809	0.0273		40.0333	0.2748	17.85	0.0571	0.0382	0.2237	0.0541	0.0027		0.0001	97.1717
NQN 4 II Spherule C Core 2	40.2426	0.0328	0.1029	40.264	0.3518	19.1537		0.0153	0.2247	0.0578	0.0061		0.0021	100.413
NQN 4 II Spherule C Core 3	39.5348	0.0237		40.4253	0.2522	18.8749	0.0176	0.0081	0.2393	0.0525	0.0058		0.0035	99.3344
NQN 4 II Spherule C Core 4	39.5335	0.0359	0	40.1581	0.3159	19.5329	0.0208	0.0007	0.2545	0.0674	0.0063		0.003	99.8858
NQN 4 II Spherule C Rim 1	48.6546	3.2103	15.9089	4.2835	9.7837	11.4928	3.5705	1.9197	0.1658	0.8859	0.0747	0.1188	0.0424	100.112
Fe-rich
NQN4 Spherule A Core 1		12.5168	3.3905	3.4479	0.0229	73.7053	0.0119	0.0256	0.5548	0.0017	0.0009	0.0312	0.0011	93.6844
NQN4 Spherule A Core 2	0.0055	12.5301	3.6404	3.7627		76.785		0.0379	0.5541	0.0045	0.0042	0.0161		97.3211
NQN4 Spherule A Core 3	0.0329	12.544	3.4273	3.5441	0.0311	73.5051	0.0265	0.01	0.5468	0.0032	0.0051	0.0228	0.0031	93.702
NQN4 Spherule A Rim 1	0.0137	12.474	3.3699	3.7321	0.0401	75.9137			0.5457	0.0043	0.0005	0.0237	0.0025	96.058
NQN4 Spherule A Rim 2	0.0668	12.4723	3.2607	3.6391	0	75.703	0.0903		0.5484	0.0119	0.0092	0.0221		95.8058
NQN4 Spherule A Rim 3	0.0684	12.5624	3.8302	3.5803	0.0131	76.3424			0.5484	0.0075	0.009	0.0224	0.003	96.8769
Carbonate
NQN5 Spherule B Core 1	0.0371	0.0023		0.0315	55.8277	0.0938	0.0085		0.0228	0.0245	0.0278	0.0491	0.0005	56.003
NQN5 Spherule B Core 2				0.0459	55.64	0.0611	0	0.0072	0.0226	0.028	0.0094	0.0177	0.0002	55.7895
NQN5 Spherule B Core 3	0.0066		0.0905	0.0754	55.6065	0.0016		0.0663	0.0112	0.0104	0.005	0.0349	0.0007	55.8848
NQN5 Spherule B Core 4	0.066	0.0033	0.0183	0.0912	55.5975	0.1867	0.0009		0.0249	0.0321	0.0619	0.0669	0.0007	56.119
NQN5 Spherule B Rim 1	0.0148		0	0.0901	55.1999	0.0377	0.0104	0.0115	0.0156	0.0474	0.1412	0.0706	0.0103	55.6492
NQN5 Spherule B Rim 2	0.0677		0.0844	0.1107	55.5996	0.0072		0.0106	0.0125	0.0416	0.1053	0.0616	0.0118	56.0875
NQN5 Spherule C Core 1	0.0892		0.0788	0.1414	54.136		0.1274		0.0099	0.1212	0.5302	0.1482	0.0026	55.2383
NQN5 Spherule C Core 2	0.0054	0.001		0.1315	56.4169	0.0731	0.0302	0.0308	0.0113	0.1027	0.5045	0.1418	0.0017	57.4282
NQN5 Spherule C Core 3	0.043			0.2761	54.6075	0.0681	0.0047			0.0144	0.082		0.0023	54.9961
NQN5 Spherule C Rim 1			0.0849	0.1102	54.9377	0.1691	0.0775	0.0199	0.0104	0.155	0.5282	0.1808	0.0115	56.2777
NQN5 Spherule C Rim 2	0.065			0.101	54.9914		0.0339	0.0169	0.0098	0.1274	0.5278	0.1402	0.0062	55.8349
NQN5 Spherule C Rim 3	0.0182	0.0011	0.0604	0.1749	54.9355	0.0906	0.0519		0.0133	0.1152	0.5479	0.1371	0.0074	56.1514
NQN5 Spherule D Core 1	0.1062	0.0095	0.0662	0.1296	54.7558		0.033	0.0082	0.004	0.1089	0.5625	0.1553	0.0023	55.9094
NQN5 Spherule D Core 2	0.0148		0.0657	0.2171	54.2244		0.0273	0.0055	0.0073	0.0752	0.5589	0.1422	0.0075	55.2673
NQN5 Spherule D Core 3	0.0264	0.0003	0.0341	0.2613	55.3382		0.126	0.0253	0.0016	0.0479	0.519	0.1469	0.0047	56.436
NQN5 Spherule D Rim 1	0.0733	0.0034	0.0421	0.1852	53.8515	0.0976	0.0518		0.0084	0.0657	0.6178	0.1863	0.0157	55.1727
NQN5 Spherule D Rim 2	0.052			0.3647	56.5544		0.0124			0.0073	0.0786	0.0177	0.0125	57.0094
NQN5 Spherule D Rim 3	0.0101		0.0911	0.1127	56.7671			0.0258	0.0227	0.0952	0.152	0.1186	0.01	57.2157
NQN5 Spherule E Core 1	0.0272	0.0007	0.057	0.1546	57.1132	0.1394			0.0043	0.0396	0.2086	0.0947	0.0068	57.7551
NQN5 Spherule E Core 2	0.0909	0.0016	0.0851	0.1733	56.6718	0.0693			0.0109	0.0483	0.1469	0.0629	0.003	57.3103
NQN5 Spherule E Core 3	0.0999	0.0019		0.1813	56.3146	0.088	0.0461	0.0248	0.004	0.0421	0.2846	0.1052	0.0117	57.1646
NQN5 Spherule E Rim 1		0.0035	0.0222	0.1177	56.0293		0.0479	0.0259	0.0082	0.0312	0.3543	0.0775	0.017	56.6482
NQN5 Spherule F Core 1	0.0186			0.0166	56.6929	0.0882	0.0133	0.0213	0.0087	0.0141	0.1118	0.0692	0.0033	57.0287
NQN5 Spherule F Rim 1				0.1163	56.5796	0.0196	0.0355		0.0209	0.0281	0.1549	0.0663	0.0178	56.9329
NQN5 Spherule F Rim 2	0.0108			0.025	56.4677	0.0195			0.0169	0.0189	0.1604		0.0135	56.6238
NQN5 Spherule G Core 1	0.0116	0.001		0.1559	56.8277				0.009	0.019	0.1372	0.0552	0.0036	57.071
NQN5 Spherule G Core 2	0.0008	0.0064	0.0058	0.1945	58.1559			0.0173	0.006	0.0888	0.2294	0.1349	0.0078	58.8291
NQN5 Spherule G Core 3	0.0546	0.0026		0.2616		0.0603	0.0256	0.0335		0.0465	0.1603	0.0412	0.0054	68.78
NQN5 Spherule G Rim 1	0.0441		0.0736	0.1287	56.6095	0.0165		0.0219	0.0137	0.0388	0.365	0.0823	0.0232	57.3859
NQN5 Spherule G Rim 2	0.0441		0.0169	0.1343	55.3963	0.0984	0.0292	-0.0048	0.0254	0.0285	0.3382	0.1475	0.0205	56.2732
NQN5 Spherule H Core 1		0.0109	0.079	0.1952	55.3719	0.078		0.0088		0.0475	0.3045	0.0836	0.0123	56.1729
NQN5 Spherule H Core 2	0.029			0.163	54.5983		0.0133	0.0077	0.0018	0.0315	0.2439	0.0863	0.0125	55.0914
NQN5 Spherule H Rim 1		0.0012		0.1779	55.0722	0.0828	0.0398	0.0189	0.0073	0.0381	0.2792	0.0992	0.0189	55.7316
NQN5 Spherule H Rim 2		0.0014		0.2049	54.1641			0.0153		0.1072	0.5189	0.1502	0.0197	55.0779
NQN5 Spherule I Core	0.0826	0.0017	0.0424	0.2431	54.6896		0.0104		0.0124	0.1906	0.1733	0.1009	0.0042	55.4858
NQN5 Spherule I Core 2	0.0074			0.264	55.0011		0.0208	0.0245	0.0041	0.1828	0.1836	0.1013	0.0029	55.6648
NQN5 Spherule I Core 3			0.0484	0.243	55.1443	0.0233	0.0047	0.0225	0.0077	0.0949	0.0838	0.0084		55.6527
NQN5 Spherule I Core 4		0.0012	0.0119	0.2894	55.2549	0.0802	0.0123		0.0215	0.137	0.113	0.0326	0.0011	55.9275
NQN5 Spherule I Rim 1		0.0041		0.2855	55.3192	0	0.0349	0.0198	0.0021	0.1139	0.1692	0.0615	0.0096	55.8998
NQN5 Spherule I Rim 2	0.0074	0.0062		0.2664	54.5672	0.0874	0.0312			0.2706	0.1812	0.1315	0.0129	55.4892
NQN5 Spherule J Core 1	0.019	0	0.0063	0.1166	55.6365	0.0497			0.0167	0.0635	0.0656	0.0581		55.9912
NQN5 Spherule J Core 2	0.0603	0.0023	0.012	0.18	55.5597	0.0056		-0.0033		0.0237	0.003	0.0031	0.0005	55.8119
NQN5 Spherule J Core 3	0.0099	-0.0013		0.0898	56.1774		0.0671	-0.0025	0.0156	0.0408	0.0895	0.0215		56.4678
NQN5 Spherule J Rim 1	0.1309	0.004	0.0482	0.0643	55.3757	0.0584	-0.0028	-0.0031		0.044	0.0533		0.0099	55.7422
NQN5 Spherule J Rim 2	0.135	-0.0038	0.0065	0.1165	54.658	0.0512	0.016		-0.0043	0.0883	0.033	0.0281	0.0016	55.1148
NQN5 Spherule K Core 1				0.0493	55.3668	0.0032	0.0538	0.0195	0.0121	0.0168	0.0301	0.0373	0.0036	55.5156
NQN5 Spherule K Rim 1	0	0.0002		0.0793	55.3844			0.0376	0.019	0.0296	0.0872	0.0447	0.0038	55.5674
NQN5 Spherule K Rim 2		0.0015	0.1272	0.2129	55.581	0.1427	0.0076	0.0047	0.0016	0.0034	0.001	0.0049	0.0084	56.0738
NQN5 Spherule L Core 1	0		0.0842	0.0882	55.3785				0.0145	0.0176	0.0013	0.0334	0.0023	55.5389
NQN5 Spherule L Rim 2	0.0337	0.0014		0.0306	55.3548	0.0752		0.0016	0.005	0.019	0.1094	0.0316	0.01	55.6345
NQN4 Spherule B Core 1		0		0.3764	56.3464	0.1146	0.032	0.0316		0.0023	0.0121	0.0059	0.0039	56.7954
NQN4 Spherule B Core 2		0.0082	0.0062	0.1645	55.0866	0.0216	0.0028		0.0171	0.0633	0.0638	0.1362	0.005	55.52
NQN4 Spherule B Core 3	0.0132		0.0424	0.1396	55.1373		0.0066		0.0161	0.0376	0.0741	0.1382	0.0031	55.5464
NQN4 Spherule C Core 1		0.0004	0.0423	0.1139	56.4075					0.0455	0.0067		0.0041	56.498
NQN4 Spherule C Core 2	0.1062		0.0171	0.0383	57.0383	0.0106	0.0142	0.0531	0.0182	0.061	0.0897	0.0617		57.5057
NQN4 Spherule C Rim 1		0	0.0797	0.0314	56.9925	0.1069		0.0083	0.0113	0.0812	0.0619	0.0527	0.0071	57.4132
NQN4 Spherule C Rim 2	0.0341		0.023	0.1558	56.3417		0.0124	0.0217		0.0225	0.0625	0.0488	0.003	56.6671
NQN4 Spherule C Rim 3		0.0075	0.018	0.1368	54.7804	0.0448	0.0744		0.0147	0.1889	0.1591	0.0791	0.0045	55.4938
NQN4 Spherule F Core 1	0.0315	0.0013	0.0245	0.1995	55.0499			0.0092	0.0267	0.0886	0.0246	0.0722	0.0013	55.4906
NQN4 Spherule F Core 2	0.0149	0.0054		0.3147	55.1428		0.0312	0.0184	0.0003	0.1889	0.0741	0.1041	0.0021	55.832
NQN4 Spherule F Core 3	0.0454	0.0101		0.2263	55.4378	0.0193			0.0151	0.1533	0.0738	0.0772	0.0046	56.0012
NQN4 Spherule F Rim 1		0.0033		0.1866	55.2402	0.008		0.0002	0.0091	0.149	0.0881	0.0932	0.0083	55.6415
NQN4 Spherule F Rim 2		0.0052	0.0122	0.3082	55.3	0.0056	0.0719	0.0004	0.0268	0.0919	0.0288	0.0719	0.0107	55.8799
NQN4 Spherule F Rim 3		0.0013	0.0182	0.3991	55.6657				0.0211	0.0242	0.0032	0.0269	0.0113	56.0456
NQN4 Spherule G Core 1				0.1369	55.3919		0	0.0166	0.0198	0.0123	0.042		0.0027	55.4695
NQN4 Spherule G Core 2		0.0009		0.1369	55.3241		0.0132		0.0065	0.0106	0.2133	0.0732	0.0027	55.6334
NQN4 Spherule G Core 3	0.0173	0.0005	0.0243	0.0525	55.5015	0.0096			0.0276	0.0193	0.0431	0.04	0.0049	55.6994
NQN4 Spherule G Rim 1		0.0002	0.0513	0.1662	56.6059				0.0189	0.0069	0.0896	0.0276	0.011	56.8007
NQN4 Spherule G Rim 2		0.0021		0.1241	55.2382	0.077	0.0265	0.0705	0.0012	0.0103	0.2723	0.043	0.0195	55.8402
NQN4 Spherule G Rim 3	0.19	0.0038	0.0001	0.1775	55.1901	0.0169	0.035		0.0106	0.0694	0.0176	0.0503	0.0162	55.769
NQN4 Spherule I Core 1	0.0712		0.0425	0.4859	54.8433	0.0674		0.0002	0.0197	0.0087	0.1313	0.0348	0.0025	55.66
NQN4 Spherule I Core 2		0.0025		0.2842	55.1619	0.0603	0.0337	0.0216	0.0195	0.0517	0.2522	0.1175	0.0003	55.8959
NQN4 Spherule I Core 3	0.0264		0.0116	0.2189	55.9061		0.0444	0.0233	0.0146	0.0638	0.3955	0.1016	0.0086	56.711
NQN 4 II Spherule A Core 1		0.0004	0.0426	0.5368	54.8089	0.066	0.0208	0.0114	0.0216	0.1495	0.0133	0.0726		55.7101
NQN 4 II Spherule A Core 2	0.0704	0.0024		0.5607	54.7022		0.034		0.0124	0.2137	0.0344	0.0415	0.0033	55.5614
NQN 4 II Spherule A Core 3		0.001		0.5019	54.6024	0.0417		0	0.0108	0.2852	0.1337	0.0236	0.0027	55.5028
NQN 4 II Spherule A Core 4	0.0083			0.9385	54.3686	0.0249	0.0009		0.0186	0.058	0.0017	0.0404		55.4109
NQN 4 II Spherule A Core 5		0.0038	0.0243	0.8817	54.2785			0.0198	0.0247	0.0798	0.0069	0.0383	0.0009	55.2519
NQN 4 II Spherule A Rim 1		0.0012		0.1746	55.6363	0.024		0.0138		0.052	0.0222	0.0356	0.014	55.8507
NQN 4 II Spherule A Rim 2	0.0495	0.0025	0.073	0.1119	55.3762	0.0032		0.0166	0.0182	0.0703	0.0635	0.0176	0.0077	55.8028
NQN 4 II Spherule A Rim 3	0.0314	0.0047	0.0243	0.1084	55.6966		0.0161		0.0082	0.1517	0.1667	0.1271	0.0063	56.2917
NQN 4 II Spherule A Rim 4	0.0768	0.0042	0	0.1368	55.1208		0.0567	0.0096	0.0126	0.0695	0.0543	0.0788	0.0056	55.5512
NQN 4 II Spherule A Rim 5		0.0032	0.0122	0.1406	56.1021	0.0353	0.0567		0.0171	0.0668	0.06	0.0726	0.0008	56.5486
NQN 4 II Spherule E Core 1	0.0286			0.0972	56.7082				0.0049	0.0296	0.0035	0.0089	0.0002	56.7759
NQN 4 II Spherule E Core 2	0.017	0	0.0851	0.0681	56.9738	0.003	0.0266	0.0106		0.0534	0.0027			57.2213
NQN 4 II Spherule E Core 3	0.0325	0.0057		0.1209	56.5812	0.0511		0.02	0.0011	0.0737	0.0094			56.7773
NQN 4 II Spherule E Core 4	0.0163	0.0079	0.0114	0.116	57.1085	0.0391				0.1283	0.0232	0.056	0.0018	57.4916
NQN 4 II Spherule E Rim 1	0.0572	0.0033		0.1806	55.7399		0.0142	0.018		0.0215	0.0054		0.0054	55.9242
NQN 4 II Spherule E Rim 2				0.2874	56.5664	0.0955	0.0071	0.0046	0.0028	0.0171	0.0028	0.0222	0.0048	56.9269
NQN 4 II Spherule E Rim 3	0.0083	0.0008	0.0121	0.241	54.5378		0.0435		0.0143	0.169	0.0239	0.0726	0.0105	54.9864
NQN 4 II Spherule E Rim 4		0.0075	0.0056	0.1839	56.7643	0.0834		0.0166		0.017			0.004	57.0091
NQN 4 II Spherule F Core 1	0.0975	0.0025		0.1272	55.5695	0.0249	0.035	0.01		0.0581	0.033	0.0396	0.0009	55.9653
NQN 4 II Spherule F Core 2	0.0603	0.0055	0.0063	0.1472	55.2527	0.0225	0.0009	0.0035	0.0038	0.1518	0.1405	0.0483	0	55.8432
NQN 4 II Spherule F Core 3	0.0554			0.1694	55.0771					0.1305	0.1226	0.0761	0.0028	55.495
NQN 4 II Spherule F Core 4				0.1995	56.634	0.1769		0.0218	0.0072	0.0512	0.0337	0.021		56.9777
NQN 4 II Spherule F Rim 1	0.0296			0.1871	56.9201	0.0227	0.0232			0.0225	0.0322	0.02	0.0055	57.1845
NQN 4 II Spherule F Rim 2	0.0091	0.0007	0.0544	0.2166	55.1274			0.0147		0.0489	0.0332	0.0314	0.0151	55.4297
NQN 4 II Spherule F Rim 3	0.0215		0.0664	0.216	54.3563	0.0658	0.0199		0.009	0.1025	0.0636	0.0649	0.0036	54.9864
NOTES
Values in italics not included in calculating averages reported in Table 2.
Where blank value was below detection.

## Sheet: Harker diagrams
	SiO2	TiO2	Al2O3	MgO	CaO	FeO	Na2O	K2O	MnO	P2O5	SO2	F	Cl	Total
Silica-rich	wt.%	wt.%	wt.%	wt.%	wt.%	wt.%	wt.%	wt.%	wt.%	wt.%	wt.%	wt.%	wt.%
NQN2 Spherule F Core 2	73.7404	0.033	1.1134	0.1091	12.0409	0.1027	13.611	0.3973	0.0243	0.0126	0.251	0.0043	0.018	101.458
NQN2 Spherule F Core 3	72.5935	0.026	1.2377	0.1059	12.1198	0.0567	13.5877	0.4285	0.0226	0.0245	0.265		0.0233	100.484
NQN2 Spherule F Core 5	73.048	0.0282	1.0314	0.1154	12.2593	0.0246	13.7169	0.3599	0.0218	0.0161	0.2658		0.0227	100.903
NQN2 Spherule F Rim 1	71.8936	0.0227	1.0758	0.0926	11.9174		13.637	0.4402	0.027	0.013	0.2569		0.0175	99.3437
NQN2 Spherule F Rim 2	72.069	0.0288	1.2116	0.1313	12.073	0.0567	13.9643	0.4236	0.0274	0.0008	0.2578		0.0146	100.252
NQN2 Spherule F Rim 3	73.3278	0.0242	1.0528	0.0938	11.8125	0.1158	13.3921	0.3917	0.0275	0.0103	0.2667		0.0168	100.516
NQN2 Spherule F Rim 4	75.3083	0.0286	1.0867	0.0991	12.2387	0.0156	10.772	0.3571	0.028	0.0059	0.2668	0.0337	0.0204	100.261
NQN2 Spherule A Core	73.025	0.0274	1.076	0.1773	11.612	0.2137	14.207	0.3667	0.0268	0.0187	0.2158	0	0.0145	100.981
NQN2 Spherule A Core 2	73.0055	0.0319	1.0841	0.1749	11.444	0.1006	14.104	0.3695	0.0232	0.0248	0.2171	0	0.0141	100.594
NQN2 Spherule A Core 3	73.1742	0.034	1.0516	0.194	11.5046	0.1434	14.0486	0.3962	0.0324	0.0051	0.2229	0	0.0108	100.818
NQN2 Spherule A Core 4	73.5832	0.0302	0.9893	0.1521	11.8284	0.1949	14.2504	0.3354	0.031	0.0235	0.2211	0	0.0141	101.654
NQN2 Spherule A Core 5	72.5706	0.0242	1.2809	0.168	11.4605	0.058	13.9912	0.327	0.029	0.0128	0.2143	0	0.0161	100.153
NQN2 Spherule A Core 6	73.5325	0.0342	0.9505	0.1622	11.7412	0.1992	14.0498	0.4041	0.023	0.0143	0.2147	0	0.0171	101.343
NQN2 Spherule A Core 7	73.1027	0.031	1.0859	0.1546	11.6872	0.0762	14.2715	0.4553	0.0221	0.0102	0.2226	0	0.0175	101.137
NQN2 Spherule A Core 8	72.5027	0.0283	0.9749	0.1751	11.6118	0.2562	14.0753	0.4542	0.0157	0.0138	0.2297	0.0166	0.0169	100.371
NQN2 Spherule A Core 9	72.5369	0.0277	1.0523	0.192	11.5987	0.0977	14.3265	0.3502	0.0191	0.019	0.2216	0	0.0155	100.457
NQN2 Spherule A Core 10	71.7643	0.0233	0.9866	0.1702	11.6564	0.1245	14.6757	0.2893	0.0284	0.0108	0.2255	0.0019	0.0172	99.9741
NQN2 Spherule A Rim 1	72.187	0.0266	1.0949	0.1637	11.8418	0.1924	13.7491	0.4422	0.0374	0.0202	0.2134	0	0.0203	99.989
NQN2 Spherule A Rim 2	72.3906	0.0331	1.2046	0.2579	11.5272	0.3627	14.2049	0.3226	0.0217	0.0222	0.2078	0.0004	0.0138	100.57
NQN2 Spherule A Rim 3	72.1834	0.0329	1.0801	0.167	11.8808	0.149	14.4742	0.4084	0.0231	0.0163	0.2185	0.0223	0.0178	100.674
NQN 2 II Spherule Core 1	74.9007		1.7517	0.0319	6.8002		16.0573	0.2652	0.0292	0.0348	0.3203	0.4959	0.2263	100.697
NQN 2 II Spherule Core 2	75.4763		1.7307	0.0081	6.5055	0.0663	15.8725	0.2822	0.0068	0.0304	0.3341	0.5247	0.2288	100.872
NQN 2 II Spherule Core 3	75.3895		1.9948	0.0004	6.7149	0.0439	16.0122	0.2897	0.007	0.0474	0.3151	0.4642	0.2304	101.32
NQN 2 II Spherule Core 4	74.9397		1.5883		6.64	0.0617	15.978	0.2495	0.0059	0.0331	0.32	0.5026	0.2303	100.29
NQN 2 II Spherule Core 5	74.5711		1.7996	-0.0042	6.9185		16.4838	0.265	0.0181	0.0363	0.3025	0.477	0.2277	100.894
NQN 2 II Spherule Core 6	75.186		1.704		6.5478	0.0815	16.4099	0.3082	0.012	0.0497	0.3126	0.49	0.2315	101.126
NQN 2 II Spherule Core 7	74.652		1.7713		6.9078	0.04	16.2679	0.3065	0.0155	0.0332	0.3077	0.4891	0.2229	100.789
NQN 2 II Spherule Rim 1	74.1982		1.7539		6.7811	0.0715	16.2134	0.257	0.0162	0.0484	0.3195	0.4417	0.2281	100.112
NQN 2 II Spherule Rim 2	75.0691		1.5159		6.7345	0.0377	15.7185	0.2989	0.0068	0.0353	0.317	0.4461	0.2365	100.206
NQN 2 II Spherule Rim 4	73.783		1.6015		6.7813	0.0123	15.9554	0.2652	0.0184	0.0306	0.3115	0.4781	0.2282	99.2675
NQN 2 II Spherule Rim 5	72.9522		1.7315	0.0067	6.4783		15.8833	0.2963	0.0044	0.0379	0.3087	0.407	0.2304	98.1143
NQN 2 II Spherule Rim 6	73.1645		1.8066	0.0001	6.6558	0.041	15.3951	0.2226	0.0154	0.0374	0.3201	0.3328	0.2291	98.0279
NQN 2 II Spherule Rim 7	73.6757		1.8996	0.0074	6.4619	0.0426	16.0539	0.3051	0.0039	0.0278	0.3059	0.4312	0.2284	99.2515
NQN2 Spherule B Core 1	71.3935	0.0957	0.5432	3.7241	9.417	0.0991	14.1737	0.1803	0.0039	0.0038	0.22	0.0064	0.0078	99.8685
NQN2 Spherule B Core 2	72.3293	0.0979	0.7153	3.5554	9.1535	0.1994	14.0845	0.1302	0	0.0023	0.2216	0.0054	0.009	100.504
NQN2 Spherule B Core 3	72.2981	0.097	0.7207	3.6449	8.9995	0.1005	13.9096	0.2103	0.0076	0.0061	0.2199	0	0.0103	100.224
NQN2 Spherule B Core 4	72.235	0.1045	0.6192	3.6555	9.1607	0.121	14.0697	0.2018	0	0.002	0.2232	0.0032	0.0089	100.405
NQN2 Spherule B Rim 1	71.8875	0.1017	0.6907	3.7323	9.0894	0	13.9273	0.1871	0.0032	0.011	0.2408	0	0.0109	99.8819
NQN2 Spherule B Rim 2	71.6247	0.0966	0.7428	3.6843	9.0461	0.2136	13.6462	0.1943	0.0007	0	0.2321	0	0.0148	99.4962
NQN2 Spherule C Core 1	73.1592	0.0166	0.0845	3.5916	9.5369	0.097	13.6669	0.0147	0.0168	0.0021	0.1906	0.003	0.0071	100.387
NQN2 Spherule C Core 2	73.163	0.0163	0.1451	3.4327	9.4859	0.0871	13.8236	0	0	0.0067	0.1967	0	0.0056	100.363
NQN2 Spherule C Core 3	74.3675	0.0192	0.1618	3.6422	9.4524	0.1079	13.7101	0	0.0158	0.0048	0.1841	0	0.0077	101.674
NQN2 Spherule C Core 4	72.7787	0.0171	0.2407	3.741	9.4283	0.1041	13.2793	0	0.0115	0	0.1953	0	0.0058	99.8018
NQN2 Spherule C Core 5	73.6944	0.0165	0.1625	3.5847	9.1748	0.0574	13.8933	0.0093	0	0.0036	0.1961	0	0.0051	100.798
NQN2 Spherule C Core 6	72.3551	0.0141	0.1442	3.6029	9.5407	0.0802	13.6081	0	0.0015	0.0073	0.1852	0.0042	0.0046	99.5481
NQN2 Spherule C Core 6	72.7891	0.0093	0.102	3.7317	9.4784	0.0703	13.5222	0.0154	0.0021	0.008	0.1896	0	0.006	99.9241
NQN2 Spherule C Core 7	73.2662	0.0152	0.1078	3.5676	9.1237	0.1398	13.3668	0.0208	0.0084	0.0135	0.2006	0	0.0074	99.8378
NQN2 Spherule C Rim 1	75.331	0.0206	0.1638	3.7459	9.3737	0.123	14.0809	0.0121	0	0.011	0.1897	0.0039	0.0085	103.064
NQN2 Spherule C Rim 2	73.2829	0.0114	0.1556	3.5216	9.2001	0.0859	13.6883	0.059	0.01	0.0058	0.197	0	0.0087	100.226
NQN2 Spherule C Rim 3	75.2924	0.0118	0.2035	3.7211	9.6674	0.1764	13.9336	0	0	0.0096	0.1896	0.0103	0.0074	103.223
NQN2 Spherule C Rim 4	75.1944	0.0159	0.113	3.6691	9.6963	0.1571	14.0177	0.0321	0	0	0.1985	0	0.0082	103.102
NQN2 Spherule D Core 1	75.1306	0.0298	2.4635	0.2674	10.4399	0.2356	14.6851	0.8574	0.0102	0.0175	0.1758	0.0095	0.0074	104.33
NQN2 Spherule D Core 2	72.9142	0.0323	2.0172	0.25	10.287	0	13.4658	0.858	0.0025	0.0152	0.1874	0.0033	0.0071	100.04
NQN2 Spherule D Core 3	74.3587	0.0332	1.9745	0.3296	10.328	0.2003	14.3381	0.8609	0	0.0285	0.177	0.0117	0.0073	102.648
NQN2 Spherule D Rim 1	75.3026	0.0272	1.8917	0.3068	10.3879	0.0461	13.9386	0.8254	0.0016	0.0178	0.1827	0	0.0079	102.936
NQN2 Spherule D Rim 2	73.6849	0.0253	1.9081	0.2499	10.4726	0.0611	14.0891	0.9158	0.0008	0.0069	0.1827	0.0159	0.0092	101.622
NQN2 Spherule D Rim 3	72.777	0.0335	2.0894	0.244	10.1748	0.0123	13.6555	0.9342	0.0082	0.0209	0.1765	0	0.0084	100.135
NQN2 Spherule E Core 1	73.3001	0.0274	0.2593	3.8801	8.7575	0.5079	13.4468	0.184	0	0.0088	0.1956	0.0038	0.0136	100.585
NQN2 Spherule E Core 2	73.8096	0.0276	0.4038	3.8669	8.4976	0.4959	13.7936	0.1367	0.0047	0.0102	0.1817	0	0.0171	101.245
NQN2 Spherule E Core 3	74.1492	0.0257	0.2978	3.7672	8.5629	0.6191	13.7205	0.1233	0.0086	0.0135	0.1957	0	0.019	101.502
NQN2 Spherule E Core 4	72.9162	0.0363	0.2707	3.9087	8.6846	0.4491	13.3318	0.2135	0.0154	0.0124	0.1797	0	0.0166	100.035
NQN2 Spherule E Rim 1	74.5045	0.0356	0.4263	3.9543	8.8246	0.4695	13.7692	0.2141	0.0111	0.0238	0.1795	0	0.0155	102.428
NQN2 Spherule E Rim 2	72.4332	0.0443	1.1075	3.8057	8.2888	0.5136	13.4611	0.5151	0.0141	0.0094	0.1568	0.0085	0.0161	100.374
NQN2 Spherule E Rim 3	75.1273	0.0307	0.4414	3.8529	9.2365	0.1283	13.2648	0.1227	0	0.0079	0.2291	0.0117	0.0184	102.472
